# Supplementary material for: From Principles to Practice: An Actionable Framework for AI Governance in Healthcare Organisations
Source: Research Square preprint supplement (doi:10.21203/rs.3.rs-8302125/v1), 2025-12-16
Supplement: Supplementary file 1 [file 2ff92dede5009cc8916f6feb.xlsx]

## Sheet: SF2
No.	Questions	Human, societal and environmental wellbeing	Human centred-values	Fairness, justice, bias	Privacy protection and security	Reliability and safety	Transparency and explainability	Contestability	Accountability	Non-maleficence	Confidentiality	Consent	Culturally appropriate	Sustainability	Trust	Appropriateness & relevance	Usability & adoption	Stakeholder engagement	Awareness, education & training	Legal, regulatory, contractual, & human rights compliance	Data quality & appropriateness	Data governance & storage	Training & validation	Interoperability	Evaluation & performance	Accuracy	Continuous monitoring & maintenance	Reporting & risk management	Updating or decommissioning	Technical integration	Workflow/clinical integration	Organisational readiness & alignment	Leadership & management	Financial considerations
	AI TOOL IN-TAKE
	In-take questions
1	AI tool name and version
2	Lead contact person and role								x																								x
3	Date of submission
4	Proposed start date for implementation or trial
5	What stage is the AI tool at in its lifecycle
6	Deployment context
7	Clinical or operational function of the tool?
8	What level of clinical risk is associated with the tool’s use?									x																		x
9	Project pathway
10	Will the tool provide outputs that directly influence patient care?	x
11	Will the tool be used for real-time decision-making?
12	Will the tool access or process identifiable health data?				x						x
13	Will the tool require integration with internal systems (e.g. EMR, PAS, cloud infrastructure, etc)?																													x
14	Tool development								x
15	Ethics approval																			x
16	Has a Privacy Impact Assessment (PIA) or cybersecurity review been conducted?				x
1	BACKGROUND DETAILS
	AI tool/Company information
1.1	Unit, department & campus name
1.2	Healthcare organisation contact details
1.3	Company name
1.4	Company contact details
1.5	Registered company/ organisation address
1.6	Business registration number
2	PROBLEM IDENTIFICATION
	Problem description
2.1	Problem statement	x														x
2.2	Evidence-based practice															x
2.3	Value proposition	x														x																x		x
2.4	Benchmarking or comparative analysis					x																			x	x								x
3	DESIGN AND DEVELOPMENT
	AI tool description
3.1	Intended use															x
3.2	Model type
3.3	AI tool output
3.4	Stakeholder involvement																	x
3.5	Intellectual property (IP)								x
3.6	Commercialisation arrangements								x
3.7	Proposed research study design																								x
3.8	Research ethics documentation																			x
	Data pipeline
3.9	Dataset preparation and target population																				x		x	x	x
3.1	Dataset pre-processing and missing data																				x		x
3.11	Predicted target outcomes
3.12	Gold standard definition of target outcomes
	Consumer/ user perspectives and involvement
3.13	Patient/ consumer involvement																	x
3.14	Patient/ consumer communication						x											x
3.15	Inclusive care			x									x
3.16	Informed consent		x									x
3.17	Health information		x																			x
3.18	Feedback mechanisms							x																				x
3.19	Access			x
4	VALIDATION AND SAFETY
	AI tool Performance
4.1	Performance																								x	x
4.2	Performance metrics rationale																								x
4.3	Success metrics			x																					x
4.4	Validation methods																						x		x	x
4.5	Ethical impact summary	x	x	x			x			x
4.6	Decision thresholds																								x	x
	Clinical safety and risk
4.7	Quality and clinical governance					x														x
4.8	NSQHS Standards					x														x
4.9	Regulation & standards					x														x
4.1	AI tool registration and certification					x														x
4.11	Further documentation					x														x
	Technical security
4.12	Personally identifiable data				x						x
4.13	Data privacy compliance and impact assessment				x															x
4.14	Data storage				x																	x
4.15	International data storage				x																	x
4.16	Data control				x																	x
4.17	Technical & cyber security				x															x
4.18	Penetration testing				x
4.19	Source code security review				x
4.2	Multi-Factor Authentication				x																	x
5	IMPLEMENTATION AND INTEGRATION
	Clinical workflow integration
5.1	Service/ care pathway mapping								x																						x
5.2	Trial workflow changes																														x
5.3	Continuity plan																													x	x
5.4	Scoring timeframe and context																												x		x
5.5	Integration																													x
5.6	Load testing																													x	x
	Human-computer interaction
5.7	Human-AI interaction								x																						x
5.8	Liability								x
5.9	User interface design																x	x
5.1	User-facing explainability						x										x
5.11	User acceptance testing								x
5.12	Human-AI agreement		x				x
5.13	User training and communication						x												x
5.14	Patient-facing documentation or demonstration						x												x
5.15	Public transparency plan						x								x
5.16	Risk management framework									x																		x				x
5.17	Web content accessibility (if applicable)								x																		x
6	MONITORING AND EVALUATION
	Monitoring and evaluation
6.1	Monitoring and evaluation frequency								x																		x
6.2	Equity analysis			x																					x
6.3	Evaluation components																								x	x	x		x
6.4	Safety monitoring and escalation triggers					x			x																		x	x	x				x
6.5	Change management for AI model updates								x																				x				x
6.6	AI tool removal plan																												x
6.7	Alignment with Learning Health System	x												x
7	FUNDING
	Funding
7.1	Pricing cost and structure																																	x
7.2	Implementation costs																																	x
7.3	Technical support																																	x
8	ADDITIONAL INFORMATION
	Further information
8.1	Provide additional information about the AI tool not covered above.
