# Supplementary material for: From Principles to Practice: An Actionable Framework for AI Governance in Healthcare Organisations
Source: Research Square preprint supplement (doi:10.21203/rs.3.rs-8302125/v1), 2025-12-16
Supplement: Supplementary file 2 [file 9dab9e1113f38691e7154ef2.docx]

**Supplementary file – AI governance framework**

AI healthcare governance framework

Overview and purpose

This framework provides a practical and adaptable approach to artificial intelligence (AI) governance for healthcare organisations. It is designed to support the safe, ethical, and context-appropriate use of AI by outlining key structures, processes, tools, and principles to guide adoption and oversight. The framework supports health services to evaluate, approve, and monitor AI tools in a way that aligns with their strategic priorities, ethical obligations, and operational capabilities.

The framework is intended to be flexible, scalable and applicable across healthcare organisations with varying levels of digital maturity. Organisations are encouraged to adapt the components to suit internal capabilities, strategic priorities, and local regulatory requirements. It is designed as a starting point for those new to AI governance or as a tool to refine and strengthen existing processes. The framework supports organisations to build or strengthen AI governance in a way that reflects their local context, existing processes, and organisational readiness. It includes:

- A tiered governance model that provides flexible oversight pathways for organisations with mature, developing, or limited digital capacity (Appendix 1).
- Definitions of core and consultative governance roles, along with guidance on mapping expertise to review responsibilities across the AI lifecycle (Appendix 2).
- A standardised review checklist to support consistent evaluation of AI tools, adaptable to local governance processes (Appendix 3).
- A mapping template that links organisational ethics and governance principles to specific review checklist items, helping services identify existing coverage and areas requiring adaptation (Appendix 4).
- Consolidated definitions of AI ethics and governance principles to support consistent interpretation and application across governance activities (Appendix 5).
- An AI use register template to enable transparent tracking of AI tools, approval decisions, monitoring requirements, and lifecycle changes (Appendix 6).

Appendix 1: AI governance oversight mechanisms

1. Purpose

Establishing a robust oversight mechanism is critical to ensure AI tools are implemented safely, effectively, and ethically. Governance structures must be both proportional to the risks posed by AI tools and tailored to the operational realities of healthcare organisations, which can vary significantly in digital maturity, resource availability, and institutional capacity.

The following tiered approach to AI governance is designed to accommodate diverse organisational contexts and stages of AI maturity. Three distinct governance pathways are proposed for mature, developing, or limited digital capacity healthcare organisations. Each pathway includes considerations for structuring AI oversight, embedding interdisciplinary expertise, and applying a standardised review process using the AI review checklist (Appendix 3).

This flexible approach supports the responsible adoption of AI tools across a broad spectrum of healthcare settings, while maintaining core principles of transparency, accountability, and patient safety. Given the wide variation in AI capability and resourcing across healthcare organisations, these oversight mechanisms are adaptable templates, rather than prescriptive structures. It is recommended that each healthcare organisation adapts and develops an approach that reflects its own specific governance arrangements, digital infrastructure, and workforce capacity.

1. Oversight mechanisms based on digital maturity

The oversight mechanisms are aligned to different levels of digital maturity:

- Mature digital capacity, where a dedicated AI governance committee provides centralised oversight, supported by an advisory group and operational team.
- Developing digital capacity, where an existing multidisciplinary committee (e.g. digital health or executive committee) is delegated responsibility for AI oversight.
- Limited digital capacity, where AI oversight is embedded across existing governance mechanisms such as clinical governance, digital health, ethics, and procurement.

These models support a tiered approach to AI governance that allows organisations to align oversight with their infrastructure, workforce capability, and readiness, while maintaining consistency with safety, ethics, and regulatory standards.

Healthcare organisations differ significantly in digital capability, which shapes both the types of AI they can safely adopt and the governance structures they can support. For organisations with limited digital capacity, embedding AI oversight into existing governance pathways provides a proportionate and practical starting point. These organisations often have constrained infrastructure and limited specialist expertise and are therefore best suited to focus on targeted AI use cases that are operationally critical or lower in risk. This avoids the substantial administrative and workforce investment required to govern more complex AI tools and recognises that early-stage organisations may not yet be equipped to manage higher-risk or operationally complex AI applications. Digitally mature organisations are more equipped to support a broader and more proactive approach to AI and AI governance. These services typically have infrastructure that better accommodates AI integration, more established digital governance processes, and access to specialist expertise in areas such as data governance, privacy, cybersecurity and clinical governance. A dedicated AI advisory or governance committee can set organisational priorities, assess strategic fit, and provide structured oversight of safety, ethics and implementation. Mature organisations are also more likely to have the resourcing needed to move AI tools efficiently through approval pathways, ensure ongoing monitoring, and embed AI governance within existing executive and operational functions over time.

2.1 Digitally mature health services

**FUNCTION**

Digitally mature healthcare organisations, those with well-established infrastructure, experienced personnel, stable funding, and embedded digital governance systems are recommended to establish a high-level, multidisciplinary AI governance committee. The AI governance committee provides centralised oversight of AI development, procurement, implementation, and monitoring.

As healthcare organisations become more experienced in implementing and reviewing AI tools, governance responsibilities can gradually transition from dedicated or delegated committees into existing executive and governance structures. This approach recognises that as staff capability and AI literacy grow, risks can be managed within established domains such as data governance, privacy, cybersecurity, clinical governance. Over time, an executive role, such as a Chief AI Officer or equivalent, could oversee the prioritisation, need, and suitability of AI tools alongside other executive functions, supporting consistent and accountable decision-making across the organisation.To ensure effective governance across the AI lifecycle, the oversight committee should consider the following core functions:

Specialist governance oversight

- Serve as a centralised body to streamline AI-related decision-making, address stakeholder queries, and clarify the committee’s purpose and scope.
- Advise on AI priorities to ensure alignment with organisational goals and strategic objectives.
- Include members with specialised expertise in AI, digital health, ethics, and clinical governance to ensure informed guidance.

Governance mapping and gap analysis

- Perform a mapping exercise to determine which elements of the AI review checklist are suitably addressed by existing organisational processes.
- Identify common gaps, such as:
- Bias and fairness assessments.
- Patient consent and communication.
- Post-implementation monitoring and evaluation.
- For each identified gap, determine whether:
- It can be integrated into the remit of an existing process or committee.
- Temporary or external subject matter expertise is required (e.g. ethics, data science, consumer input). Where external support is required, the coordinating body should facilitate access and document the rationale, source of advice, and recommendations provided.

Ethical oversight and risk management

- Assess clinical, ethical, and operational risks, ensuring appropriate safeguards are in place.
- Apply a tiered risk assessment approach to distinguish between low and high-risk AI tools.
- Ensure transparency, accountability, and fairness are considered in AI design and deployment.
- The risk profile of each AI tool should be assessed by the implementing healthcare organisation in accordance with its specific risk tolerance, digital maturity, governance infrastructure, clinical context, and capacity to monitor and manage AI systems over time.

Approvals and monitoring

- Define approval pathways for various types of AI tools (e.g. clinical, operational, research).
- Endorse appropriate projects and oversee mechanisms for ongoing monitoring, evaluation, and decommissioning.
- Provide constructive feedback on non-approved projects to guide improvement and resubmission.
- Build the capacity of other governance committees or processes to eventually take on AI-related responsibilities as organisational AI maturity increases.

Interdepartmental representation

- Ensure diverse and interdisciplinary representation from clinical, operational, digital, legal, consumer, and research areas.
- Adapt membership to reflect the focus of individual AI projects or stages in the AI lifecycle.

Adaptation and capacity building

- Continuously review and refine the committee’s role, remit, and processes in response to organisational learning and technological developments.
- Oversee and inform AI literacy initiatives across the organisation, including education, training, and professional development to support safe and confident use of AI tools.

Reviewing AI

- Require all AI project teams to complete the AI review checklist prior to committee evaluation (Appendix 3).
- AI committee to review submissions in collaboration with the operations group and advisory group, ensuring risks across key domains (e.g. clinical, technical, legal, ethical, research, operations) are identified and mitigated.

*Example*: If a generative AI scribe tool is proposed to draft patient discharge summaries, the project team completes the AI review checklist. The operations group provides support during the process. The governance committee assesses the submission and consults advisory group experts as needed. A recommendation is issued, and the tool is subject to post-implementation monitoring.

Monitoring and evaluation

Following deployment, the AI operations group (with oversight from the committee) is responsible for overseeing the monitoring and evaluation of approved AI tools, in line with the criteria outlined in the AI review checklist. This may include audits, performance monitoring, risk reviews, usage data analysis, and structured feedback from end users. Monitoring activities should be proportionate to the tool’s risk, intended function, and context of use, and all evaluation requirements should be clearly documented during the approval process within the AI review checklist. Monitoring should occur at defined intervals appropriate to the tool’s assessed risk level, for example:

- High-risk tools could be reviewed at 3, 6, and 12 months post-implementation, then annually.
- Moderate-risk tools: review at 6 and 12 months, then every 2 years.
- Low-risk tools: review within 12 months, then ad hoc or as part of routine IT/digital audits.

Escalation triggers for re-evaluation may include:

- A significant drop in performance or accuracy (based on internal audits or real-world outcomes).
- Evidence of model drift, bias, or inequitable outcomes.
- Reported incidents or adverse events linked to tool use.
- Major updates to the model, underlying data sources, or clinical use case.
- Regulatory alerts or significant vendor changes.
- End-user complaints or concerns raised through feedback mechanisms.

The AI governance committee may be reconvened at any point to assess these triggers and determine whether further review, retraining, restriction, or decommissioning is required.

Post-approval responsibilities

- Maintain awareness of implementation progress, including updates on adherence to any conditions set during the approval process.
- Require the AI project team to report on:
  - Predefined implementation milestones.
  - Monitoring outcomes and safety measures, as outlined in the checklist (Section: Monitoring and Evaluation).
- Establish a mechanism for collecting end-user feedback and incident reports to support continuous improvement.
- Reconvene the committee if tool performance issues arise, or if there are major updates to its design, scope, or function.
- Maintain an internal AI use register (Appendix 6) that documents approved tools, decision dates, review outcomes, and ongoing monitoring activities. This register should be accessible to relevant internal stakeholders to promote transparency and organisational learning.

**AI GOVERNANCE COMMITTEE**

The AI governance committee should be established as a standalone body to oversee the evaluation, approval, and monitoring of AI tools. This committee should operate independently from other governance structures to ensure specialised and robust oversight. The committee structure should be reassessed periodically as organisational AI maturity increases or with changes in technology and integration contexts. The following roles should be considered:

Committee reporting structure

- The AI governance committee should formally report to an executive-level or board-level committee to ensure appropriate endorsement, visibility, and accountability.
- The AI governance committee reporting line should align with the organisation’s strategic priorities, values, and risk threshold.

Core committee membership

- Core committee membership should include representation from key domains, for example:
  - Clinical.
  - Technical (e.g. IT, Engineering, cybersecurity ).
  - Digital health.
  - Data science.
  - Ethics, legal, regulatory.
  - Operational and administrative
- Membership should reflect the core domains covered in the AI review checklist (Appendix 3) and may be expanded depending on the nature, function, and setting of the AI tool.
- Specialist expertise can be drawn in through additional advisory group members or consultative pathways.

AI advisory group

- Establish a consultative advisory group composed of subject matter experts who can be engaged as needed on a case-by-case basis.
- This group supports the committee by providing advice on specific tools, technologies, or clinical contexts, but does not form part of the core committee membership.

AI operations group

- Create an operations group (a sub-group of the AI governance committee) to manage day-to-day implementation support and internal coordination.
- This group may be responsible for:
  - Supporting project teams in completing the AI review checklist.
  - Maintaining awareness of AI procurement and deployment.
  - Supporting AI tool monitoring.
  - Ensuring alignment with internal policies, workflows, and digital systems.

2.2 Developing digital capacity

**FUNCTION**

Moderately resourced healthcare organisations (those with foundational infrastructure but limited or variable capacity) can effectively manage AI oversight by delegating governance responsibilities to an existing multidisciplinary committee (e.g. a digital health, clinical innovations, or quality and safety committee). This committee would coordinate the review of AI proposals using the AI review checklist, assessing submissions across ethical, clinical, technical, and operational domains. This model does not require a dedicated AI governance committee but relies on adapting and expanding existing governance arrangements.

Nominate committee

- Appoint an appropriate existing committee (e.g. digital health, clinical innovation, safety and quality, etc.) to manage AI governance responsibilities.
- This committee becomes responsible for reviewing AI proposals using the AI review checklist and issuing recommendations.

Core governance roles

- Assign key governance roles within the committee (which may require expanding the committee’s membership and remit):
  - Manage communications, documentation, and meeting timelines.
  - Collate reviewer input and produce a final recommendation report.
  - Identify component leads aligned to checklist domains, for example:
    - Clinical.
    - Technical (e.g. IT, Engineering, cybersecurity).
    - Digital health.
    - Data science.
    - Ethics, legal, regulatory.
    - Operational and administrative
- Component leads provide subject matter input on an as-needed basis, depending on the tool’s intended use and associated risks.

Governance mapping and gap analysis

- Perform a mapping exercise to determine which elements of the AI review checklist are already addressed by existing organisational processes.
- Identify common gaps, such as:
- Bias and fairness assessments.
- Patient consent and communication.
- Post-implementation monitoring and evaluation.
- For each identified gap, determine whether:
- It can be integrated into the remit of an existing process or committee.
- Temporary or external subject matter expertise is required (e.g. ethics, data science, consumer input). Where external support is required, the coordinating team should facilitate access and document the rationale, source of advice, and recommendations provided.

AI review checklist

- Require all AI project teams to complete the AI review checklist.
- The committee then:
  - Ensures the checklist is complete and aligns with organisational standards.
  - Consults component leads to assess risks, feasibility, and alignment with policy.
  - Makes a formal recommendation to a designated decision-making body (e.g. clinical governance committee, executive leadership group).
  - Each organisation should identify which internal body has final decision-making authority for AI deployment. This may vary depending on whether the tool is intended for clinical, operational, research, etc. use.

*Example*: If an AI tool is proposed to forecast inpatient capacity, the project team completes the AI review checklist. The delegated committee reviews the submission, consults component leads, and compiles a recommendation report for executive-level review and approval.

Post-approval responsibilities

- Maintain awareness of implementation progress, including updates on adherence to any conditions set during the approval process.
- Require the project team to report on:
  - Predefined implementation milestones.
  - Monitoring outcomes and safety measures, as outlined in the checklist (Section: Monitoring and Evaluation).
- Establish a mechanism for collecting end-user feedback and incident reports to support continuous improvement.
- Reconvene the committee if tool performance issues arise, or if there are major updates to its design, scope, or function.
- Maintain an internal AI use register (Appendix 6) that documents approved tools, decision dates, review outcomes, and ongoing monitoring activities. This register should be accessible to relevant internal stakeholders to promote transparency and organisational learning.

2.3 Limited digital capacity

**FUNCTION**

Limited-resourced healthcare organisations (those facing constraints in infrastructure, workforce, funding, etc.) may lack the capacity to establish dedicated AI governance structures. In these settings, AI oversight can be embedded into existing governance functions and approval workflows, such as clinical governance, digital health, cybersecurity, or risk committees or processes. This approach minimises duplication, leverages existing processes, and supports proportionate governance using available resources.

A nominated team or department such as digital health, quality improvement, or clinical governance should serve as the primary landing point for AI proposals. This team is responsible for initiating the governance process and coordinating review across the appropriate internal structures. The following roles should be considered:

Identify governance structures

- Map the stages of AI development, procurement, deployment, and monitoring to current oversight bodies. For example, responsibilities may align with:
  - Medical device or innovation approval.
  - Clinical governance.
  - Research ethics.
  - Risk or digital health committees.
  - IT or cybersecurity teams.

Governance mapping and gap analysis

- Maintain awareness of implementation progress, including updates on adherence to any conditions set during the approval process.
- Identify common gaps, such as:
  - Bias and fairness assessment.
  - Patient consent and communication.
  - Post-implementation monitoring and evaluation.
- For each identified gap, determine whether:
  - It can be integrated into the remit of an existing process or committee.
  - Temporary or external subject matter expertise is required (e.g. ethics, data science, consumer input). Where external support is required, the coordinating team should facilitate access and document the rationale, source of advice, and recommendations provided.

AI review checklist

- Require all project teams to complete the AI review checklist prior to submission.
- The checklist is submitted to the designated coordination team (e.g. digital health), which then forwards relevant sections to internal departments for review and sign-off (e.g. IT, risk, cybersecurity, legal).
- Where checklist items fall outside existing structures, these should be flagged for escalation and documented with clear recommendations (e.g. proceed with conditions, defer pending further review, seek external advice, etc.).

Existing roles

- Governance responsibilities are distributed across current roles and committees, according to their existing scope.
- Designate a coordinating officer or team (e.g. digital health, innovation lead, etc.) to track progress, follow up responses, and ensure alignment with organisational policy.
- This coordinator maintains documentation, facilitates interdisciplinary input, and ensures the project team addresses any identified gaps.

*Example*: If an AI tool is proposed to predict emergency department triage, the project team completes the checklist. The coordinator facilitates review by clinical governance (for clinical safety and workflow implications), IT (for technical integration and cybersecurity), and legal (for liability and IP arrangements). A gap in fairness testing is identified. The coordinator documents the gap, facilitates external advice, and a recommendation is made to proceed with safeguards in place or defer until additional review is completed.

Post-approval

- The coordinating officer/ team oversees post-implementation monitoring, following criteria set in the AI review checklist.
- Ongoing monitoring activities are distributed across departments as appropriate, with support from the coordinating officer.
- An internal AI use register (Appendix 6) should be created and maintained that documents approved tools, decision dates, review outcomes, and ongoing monitoring activities. This register should be accessible to relevant internal stakeholders to promote transparency and organisational learning.

Appendix 2: AI governance roles and responsibilities

1. Overview

The following roles are recommended for inclusion in AI governance, either as core committee members or as contributors, depending on the context, function, and risk profile of the AI tool. Not all roles are required to participate in the core committee, but this expertise should be accessible on a case-by-case basis. Roles and responsibilities should remain flexible and responsive to the specific AI tool use case. In some cases, a single individual may represent multiple domains; in others, multiple contributors may be needed to address higher complexity or risk. Table 1 summarises example core roles and responsibilities recommended for AI governance, highlighting the expertise needed to support safe, ethical, and effective implementation. Table 2 presents example consultative roles that can be drawn upon as needed to provide specialised advice, depending on the specific characteristics or risks associated with the AI tool.

**Table 1:** Example of core roles and responsibilities

| **Role** | **Example** | **Responsibility** |
| --- | --- | --- |
| Clinical | Chief Medical Officer, Chief Nursing Officer, nurse unit managers, clinicians | Provide clinical insight, assess safety and workflow implications, and ensure alignment with clinical models of care |
| Digital health / IT | Chief Information Officer (CIO), Chief Digital Health Officer (CDHO), IT leads, cybersecurity officers | Ensure technical integration, system interoperability, and data security |
| Data science / Analytics | Health informaticians data scientists | Assess model performance, bias, explainability, and data requirements |
| Legal | In-house counsel, health law specialists | Provide regulatory advice, manage legal risks, support contractual governance |
| Ethics | Clinical ethicist, HREC member | Ensure ethical integrity, especially regarding privacy, consent, fairness, and social impact |
| Data governance | Data governance leads, data stewards, privacy officers | Ensure data quality, oversee access, sharing and de-identification, and maintain compliance with privacy, security and data governance standards |
| Operational | Project officers, performance leads | Coordinate delivery, assess feasibility, ensure milestones and performance indicators are met |
| Clinical governance and Risk | Quality and safety managers, risk officers | Ensure tools align with governance frameworks, support risk mitigation and audit readiness |

**Table 2:** Example consultative roles and responsibilities

| **Role** | **Example** | **Responsibility** |
| --- | --- | --- |
| Consumer Representative and End users | Patients, nurses, lived experience advisors | Offer real-world perspectives on usability, acceptability, consent, and transparency |
| Aboriginal and/or Torres Strait Islander and Culturally and linguistically diverse (CALD) community representatives | Aboriginal Liaison Officers, Multicultural Health Coordinators | Promote culturally safe and equitable practices; assess inclusivity of tool design and impact |
| Leadership | CIO, CDHO, Chief medical information Officer (CMIO), Clinical Operations | Provide strategic oversight, champion AI governance, ensure organisational alignment |
| Specialty-Specific | Emergency physicians, radiologists, pathologists | Provide clinical expertise specific to the AI tool’s intended setting or function |
| Education and Training | Clinical educators, workforce planners | Support AI literacy and training strategies across staff groups |
| Procurement | Contracts managers, procurement leads | Ensure compliance with procurement policy, vendor obligations, and IP issues |
| Cybersecurity | Cybersecurity team leads | Review data protection, access controls, and system resilience |
| Regulatory and Standards | TGA liaison, ISO/IEC consultants | Ensure alignment with national and international AI standards and accreditation frameworks |
| Research | Research governance manager, innovation coordinator | Support ethical approvals, pilots, and integration of research-based tools |
| Library services | eServices Librarian, Clinical Librarian | Curate and manage access to evidence-based resources; support AI tool evaluation through literature searches and metadata management; advise on information governance, digital literacy, and data stewardship |

1. Role and responsibly mapping

This section outlines practical steps to ensure the right mix of roles and expertise are embedded in AI governance processes. It includes guidance on mapping roles to governance functions, distinguishing core and consultative roles, updating governance structures, and tracking participation over time. The aim is to support inclusive, accountable, and context-specific oversight of AI tools across their lifecycle.

Map roles

- Review the AI review checklist to identify where specific expertise is required to understand the input data (e.g. ethics in consent processes, IT in technical implementation).
- Create a matrix (Table 3), mapping roles to checklist domains or review stages (e.g. clinical input for clinical validation questions, legal input for regulatory compliance).
- Use this matrix to guide role assignment during AI reviews and project initiation.

Define roles

- Determine which roles are essential for core governance membership (e.g. clinical, digital health, IT, legal, etc.).
- Identify roles that should be available on a consultative basis depending on the AI tool’s function, population, or risk profile (e.g. specialty-specific clinicians, etc.).

Embed roles

- Create and update the terms of reference for the AI governance committee to:
  - Define core membership requirements.
  - Outline procedures for accessing consultative expertise.
- Clearly document and review requirements periodically.

Establish advisory group

- Maintain a register of internal and external stakeholders who can be engaged based on relevance to differing AI tools, technologies, clinical contexts, etc.
- Ensure this pool includes lived experience advisors, specialty-specific clinicians, and community representatives for diverse populations.
- Clearly define how contributors are invited, briefed, and acknowledged.

Review process

- Integrate role-based consultation steps into the AI governance workflow.
  - e.g. ethics advisor reviews privacy impacts.
  - e.g. culturally and linguistically diverse representatives review inclusivity and cultural safety.
- Use flags or prompts in the AI review checklist to ensure appropriate consultation is triggered based on specific AI tool characteristics.

Build governance capacity

- Provide training or onboarding for governance committee members and reviewers on:
  - Ethical, legal, and regulatory dimensions of AI.
  - Cultural safety, inclusive governance, unconscious bias, etc.
  - Basic technical concepts relevant to the AI tools being reviewed.
- Offer optional deep dives for reviewers based on their role and interest area.

Track engagement

- Keep a record of who was consulted for each AI review and whether their input informed final decisions.
- Monitor and report on representation, including the number and type of community and specialty stakeholders engaged.
- Use this data to inform equity audits or quality improvement cycles.

Review membership

- Conduct regular reviews of committee membership requirements considering:
  - New technologies or clinical applications.
  - Evolving organisational needs.
  - Emerging risks, ethical concerns, or population health priorities.
- Add or adjust roles as needed to maintain relevance and effectiveness.

**Table 3:** Role-mapping matrix template

| **AI review domain** | **Core role required** | **Consultative role** | **Notes / Flags** |
| --- | --- | --- | --- |
| Clinical safety and validation | Clinical representative | Specialty-specific clinician, Allied health representatives | Trigger when AI has direct clinical impact or patient-facing outputs |
| Technical integration and interoperability | IT / Digital Health lead | Cybersecurity specialist | Required for tools that connect with EMRs, imaging systems, devices, etc. |
| Data privacy and security | Legal, IT | Ethics, Cybersecurity | Flag if patient data is stored externally or if third-party tools are used |
| Regulatory and legal compliance | Legal advisor | Regulatory/standards consultant | Needed if TGA, privacy, or IP issues are relevant |
| Equity and bias risk | Ethics, Data Science | Aboriginal and/or Torres Strait Islander rep, CALD rep | Trigger if tool targets priority or vulnerable populations |
| Usability and workflow fit | Clinical, Operational | Consumer or end-user rep, Allied health | Include when tool changes user interface, documentation, or workflow steps |
| Procurement, contracts, and vendor oversight | Procurement lead | CIO, Legal | For commercial or third-party vendor tools |
| Implementation and change management | Operational / Project Lead | Clinical educator, Training lead | Always needed if tool impacts staff practice or patient pathways |
| Monitoring and post-deployment evaluation | Clinical governance, Project Lead | Quality/safety lead, Research lead | Trigger for high-risk tools, tools using live patient data, or automation tools |

1. Guiding AI ethics and governance principles

AI ethics and governance principles were grouped into two broad categories: ethics and governance. To support practical application, each principle was mapped to relevant components of the AI review checklist (Appendix 3), allowing for consistent tracking and ensuring these values are embedded into the review and approval process. This approach maintains flexibility. Where no checklist item corresponds to a given principle, a new question can be added. Conversely, if the principle is already addressed through an existing governance process (e.g. clinical governance or cybersecurity), the corresponding checklist item can either be removed or directly linked to that internal process to avoid duplication.

Mapping AI ethics and governance principles

**Purpose**

This section supports alignment between an organisation’s high-level values and operational decision-making by ensuring that AI governance processes are grounded in a clear and actionable set of ethical and governance principles. It provides guidance on how to systematically map these principles to the AI review checklist and adapt them to local governance structures.

1. **Review principles**

- Begin by identifying your organisation’s existing values, ethics codes, digital health strategies, or AI-specific policies.
- Compare these with the standardised set of AI ethics and governance principles (Appendix 5).
- Principles are grouped into:
  - Ethics principles (e.g. fairness, consent, transparency).
  - Governance principles (e.g. monitoring, performance evaluation, system integration).

1. **Cross-reference with the AI review checklist**

- For each principle, determine whether it is:
  - Fully addressed by one or more checklist items.
  - Partially addressed but may require enhancement.
  - Missing, with no clear operationalisation in the checklist.

1. **Identify gaps**

- For missing principles, draft new checklist items that make the principle actionable (e.g. How does the tool ensure transparency and explainability for affected users?).
- For duplicated principles, consolidate or link to internal governance processes (e.g. Data privacy may already be fully addressed by an existing IT security policy).

1. **Update and align**

- Revise the checklist so that:
  - Each principle is represented by at least one measurable question.
  - Questions are practical and matched to specific reviewers or processes.
  - The checklist remains adaptable, allowing new principles to be added over time.

1. **Embed into practice**

- Embed the mapped checklist into:
  - AI approval, monitoring, and audit processes.
  - Training and onboarding materials for committee members and reviewers.
- Schedule regular reviews (e.g. annually or in response to regulatory changes) to:
  - Reflect updates in legislation, ethics frameworks, or clinical standards.
  - Retire redundant questions or add new principles over time.

Appendix 3: AI review checklist

Overview

The AI review checklist is a structured tool designed to assess whether an AI tool meets ethical, clinical, technical, legal, and operational standards. It is intended to guide consistent, transparent, and evidence-informed decision-making by healthcare organisations. The checklist supports both research and operational AI tool proposals, and is adaptable to local healthcare organisation contexts, differing risk profiles of AI tools, and existing governance processes.

**Checklist selection**

The AI review checklist is intentionally comprehensive, reflecting the broad range of ethical, clinical, technical, legal, and operational considerations relevant to the safe and effective use of AI in healthcare. However, not all questions will apply to every AI tool or proposal, and the checklist is designed to be adapted to different healthcare contexts.

Each healthcare organisation is encouraged to tailor the checklist to its specific needs, based on:

- The function and risk profile of the AI tool (e.g. administrative vs clinical decision support).
- The local context, including existing governance processes and workforce capabilities.
- The degree of overlap with other internal review processes (e.g. ethics, cybersecurity, procurement).

For example, if bias and equity risks are already assessed through an existing ethics review, the corresponding checklist items may be deprioritised or cross-referenced.

To support practical, context-specific use of the checklist, the implementation of the following tools and processes is recommended:

- Risk matrix and tiering tool: Classify AI tool proposals based on risk and complexity (e.g. low, moderate, high), and determine whether a basic, targeted, or full review is required. This ensures proportionate governance and avoids unnecessary burden in deploying lower-risk tools.
- Role-based completion matrix: Assign responsibility for completing different parts of the checklist based on internal expertise (e.g. legal, digital health, clinical safety, consumer representation). This distributes effort across relevant stakeholders and ensures the right expertise informs each domain.
- Modular digital version with logic-based filtering: Where feasible, build or customise a digital version of the checklist (e.g. smart form, REDCap, online workflow tool) that uses conditional logic to display only the questions relevant to each AI tool proposal. This enhances usability, reduces completion time, and improves the quality of responses.
- Checklist-policy alignment: Map checklist domains to existing committees or review processes to avoid duplication. Where existing structures address specific areas (e.g. privacy impact assessments, procurement criteria), checklist responses can reference these directly.
- Continuous local review: Document any local modifications to the checklist and review them regularly to ensure they remain aligned with emerging risks, technologies, and regulatory requirements.

This approach ensures the checklist remains both flexible and rigorous, enabling each organisation to embed AI governance within existing workflows while maintaining high standards of oversight.

**Use of intake questions for tiering and adaptive review**

The intake questions at the beginning of the checklist are used to determine the scope and depth of the review required. Based on the AI tool’s intended use, risk level, pathway, and lifecycle stage, each submission can be assigned a review tier (e.g. basic, targeted, or full). This enables a proportionate approach to governance, ensuring that lower-risk or early-stage tools are not overburdened by unnecessary requirements, while higher-risk or near-deployment tools receive thorough assessment. Where the checklist is delivered in a digital format, this information also drives conditional logic, so that only relevant sections and questions are displayed to the submitter. This streamlines the completion process, reduces duplication, and ensures that the right questions are asked at the right time. It is the responsibility of each healthcare organisation to define and apply its own risk thresholds based on its governance structures, risk tolerance, digital maturity, etc. Each checklist question should be aligned to a defined review tier to support this process and enable filtering by tier level in both digital and paper-based versions.

In practice, organisations may adopt a short series of “gating” questions to determine whether an AI proposal requires formal governance review. Typical gating criteria could include whether:

- The tool processes identifiable or sensitive data (patient health, financial, operational data, etc.).
- It will operate within organisational IT systems or infrastructure.
- It requires institutional resources such as integration or IT support.

Projects that meet one or more of these criteria should undergo full review by the AI governance or equivalent committee, while those that meet none can proceed through standard research or quality improvement pathways. This pragmatic gating step supports proportionality by directing detailed review only to AI tools that pose organisational or patient risk.

**Mapping ethics and governance principles to the checklist**

The checklist is aligned with 30 core ethics and governance principles (Appendix 5). Each healthcare organisation should review its existing ethics and governance policies and map them to relevant checklist questions. This process ensures:

- Principles are operationalised, not just listed.
- Existing policies or processes are recognised and leveraged.
- The checklist avoids duplication.

An ethics and governance mapping matrix template (Appendix 4) is available to assist:

- Identifying where principles are already addressed.
- Flagging gaps or duplications.
- Adding or removing checklist items as needed.

**Review process**

The committee reviews each submission as follows:

Step 1: Evaluate responses for completeness and clarity

- Review whether the project team has provided sufficient detail and relevant supporting documentation.
- Assess whether risks, safeguards, and intended use are clearly described and appropriately defined.

Step 2: Assess alignment with governance criteria

- Review each domain: ethics, privacy, bias, transparency, integration, and safety.
- Consider both tool-specific and broader organisational implications.

Step 3: Identify gaps or unclear areas

- Flag missing or vague information.
- Request clarification or follow-up from the project team.

Step 4: Make recommendations

- Provide clear guidance on next steps.
- This may include conditional approval, requests for revision, or additional documentation.

Step 5: Determine acceptability for organisational use

- Decide whether the tool meets current governance expectations.
- Document the rationale and any conditions for approval.

**Continuous improvement**

The committee should support an iterative process to ensure the checklist remains practical, relevant, and fit for purpose. This includes:

- Regularly reviewing the checklist’s effectiveness and usability.
- Refining or removing questions that are duplicative, ambiguous, or not decision-relevant.
- Adding new questions based on emerging technologies, risks, or organisational needs.
- Seeking structured feedback from those completing or reviewing the checklist.
- Ensuring continued alignment with:
  - Current regulatory requirements.
  - Organisational ethics and governance principles.
  - Feedback from both project teams and reviewers.

AI review checklist – submission instructions

This form is designed to provide [add healthcare organisation] with the necessary information to evaluate, approve, and endorse the adoption of a predictive model solution. It is intended for all AI solutions such as those focused on clinical care (e.g. patient deterioration or sepsis), patient access or resource management (e.g. length-of-stay predictions, inpatient capacity planning) and operational applications (e.g. staff allocations, facilities management).

The checklist ensures that key considerations such as transparency, bias mitigation, data security, and clinical integration are evaluated before an AI tool is either developed, implemented or deployed.

**Completing the checklist**

- Answer questions to the best of your ability using available information.
- Use subheadings in your responses for readability, where applicable.
- If a question is not relevant, mark it as Not Applicable (N/A) and provide a brief explanation.
- If a question has been answered in a separate form or governance process, state the form and attach it with your submission.
- Be clear and concise, providing enough detail to explain the AI tool’s context, risks, and safeguards, but avoid unnecessary technical information.
- Include references to any supporting documentation (e.g. policies, technical reports, ethical impact assessments, journal articles, etc.).

Ensure that all relevant questions corresponding to your AI tool’s pathway are completed prior to submission. Incomplete checklists may delay the review process. If you are unsure about a question or need clarification on which sections apply to your AI tool, note this in the checklist and contact [insert contact details].

AI review checklist

**AI TOOL IN-TAKE**

| AI Governance Gating Questions | | |
| --- | --- | --- |
| 1 | **Does the AI tool process identifiable or sensitive organisational data (e.g. patient information, staff data, or financial data)?**  Yes  No | |
| 2 | **Will the tool operate within organisational IT infrastructure (e.g. hospital servers, EMR, or internal cloud environment)?**  Yes  No | |
| 3 | **Does the project require institutional resources such as IT support, integration with hospital systems, or ongoing operational involvement?**  Yes  No | |
| Intake questions | | |
| 1 | **AI tool name and version** | Click here to enter text. |
| 2 | **Lead contact person and role** | Click here to enter text. |
| 3 | **Date of submission** | Click here to enter text. |
| 4 | **Proposed start date for implementation or trial** | Click here to enter text. |
| 5 | **What stage is the AI tool at in its lifecycle?**  Problem definition / feasibility  Early development or prototyping  Retrospective testing or validation  Prospective evaluation or clinical trial  Implementation planning  Live deployment or post-implementation monitoring  Other (please specify):_____________ | |
| 6 | **What is the deployment context?**  Emergency department  Inpatient unit (e.g. medical/surgical wards, ICU)  Outpatient clinic  Community or home-based care  Administrative or corporate setting (e.g. workforce, finance)  Diagnostic or procedural service (e.g. pathology, imaging, pharmacy)  Unsure  Other (please specify):_____________ | |
| 7 | **What is the clinical or operational function of the tool?**  Clinical decision support  Triage or risk prediction  Workflow automation  Resource or capacity planning  Patient-facing information/support  Unsure  Other (please specify):_____________ | |
| 8 | **What level of clinical risk is associated with the tool’s use?**  Low (e.g. no direct patient impact, informative only)  Moderate (e.g. informs care but requires clinician judgment)  High (e.g. autonomous or high-risk decision-making)  Unsure | |
| 9 | **What is the project pathway?**  Operational pathway (non-research)  Research pathway  Other (please specify):____________ | |
| 10 | **Will the tool provide outputs that directly influence patient care?**  Yes  No  Unsure | |
| 11 | **Will the tool be used for real-time decision-making?**  Yes  No  Unsure | |
| 12 | **Will the tool access or process identifiable health data?**  Yes  No  Unsure | |
| 13 | **Will the tool require integration with internal systems (e.g. EMR, PAS, cloud infrastructure, etc)?**  Yes (please specify):_____________  No  Unsure | |
| 14 | **How has the tool been developed?**  Externally developed (vendor product)  Co-developed with external partner  Internally developed  Unsure  Not applicable  Other (please specify):_____________ | |
| 15 | **Ethics approval**  Approved  Applied (pending)  Not yet  Not applicable | |
| 17 | **Conflict of interest declaration (do any members of the project team, developers, decision makers, etc. have an actual, potential, or perceived conflict of interest related to this AI tool such as financial interest, equity, consulting relationships, advisory roles, intellectual property ownership, etc.)?**  Yes  No  Unsure  If yes or unsure, please describe the nature of the conflict and any management strategies in place:  Click here to enter text. | |
| 16 | **Has a Privacy Impact Assessment (PIA) or cybersecurity review been conducted?**  Yes  No  In progress  Not applicable | |

- 1. **BACKGROUND DETAILS**

| AI tool/Company information | | | | |
| --- | --- | --- | --- | --- |
| 1.1 | **Unit, department & campus name** | Provide department/s and campus/s name. | Click here to enter text. |  |
| 1.2 | **Healthcare organisation contact details** | Provide name and email for [insert healthcare organisation’s name] contact person. | Click here to enter text. |  |
| 1.3 | **Company name** | Provide company/ organisation name. | Click here to enter text. |  |
| 1.4 | **Company contact details** | Provide name and email of contact person. | Click here to enter text. |  |
| 1.5 | **Registered company/ organisation address** | Provide the registered address of company (including country). | Click here to enter text. |  |
| 1.6 | **Business registration number** | Provide number. | Click here to enter text. |  |

- 1. **PROBLEM IDENTIFICATION**

| Problem description (Max 250 words – per response) | | | |
| --- | --- | --- | --- |
| 2.1 | **Problem statement** | Describe the rationale for the AI tool, including background and context. Explain the context, what the problem is, how it was identified, and why it is important to solve.  (Include details on when and where the problem arises, the risks of not solving it, and how [insert healthcare organisation’s name] has previously attempted to address the issue.) | [Provide key references to support response]  Click here to enter text. |
| 2.2 | **Evidence-based practice** | If known, describe how other healthcare organisations have handled this problem per current evidence-based practice. If similar AI tools are used at other organisations, briefly describe the outcomes to the best of your knowledge. What is the current gold standard? | Click here to enter text. |
| 2.3 | **Value proposition** | **Value to patient outcomes and/or operations**  Describe the value of the AI tool in terms of patient outcomes, clinical safety, cost savings, and efficiency.  **Added value over current practices**  Explain how the AI tool will provide greater value compared to current practices at [insert healthcare organisation’s name].  **Alignment with [insert healthcare organisation’s name]’s strategic priorities**  How does the AI tool align with [insert healthcare organisation’s name]’s strategic priorities? Please specify the strategic priorities the AI tool supports and how it contributes to achieving them (e.g. the AI triage assistant supports [insert healthcare organisation’s name]’s digital health strategy by improving ED triage and patient flow). | Click here to enter text. |
| 2.4 | **Benchmarking or comparative analysis** | Describe any benchmarking or comparative analysis performed to assess this AI tool against alternative technologies or approaches.   - What other solutions were considered or trialled? - What evidence supports the selection of this tool in terms of accuracy, efficiency, cost-effectiveness, or safety? - If no benchmarking has been done, explain why. | Click here to enter text. |

- 1. **DESIGN AND DEVELOPMENT**

| AI tool description (Max 250 words – per response) | | | |
| --- | --- | --- | --- |
| 3.1 | **Intended use** | Describe the task the AI tool is intended to support/perform (e.g. clinical decision support in sepsis detection, resource allocation, etc.). | Click here to enter text. |
| 3.2 | **Model type** | Select the type of AI technique and algorithm used/ proposed.  This could include one or more of the following:   - **Rule-based** - **Statistical reasoning** (e.g. decision tree) - **Machine learning** (e.g. linear regression, logistic regression, decision trees, random forest, support vector machines (SVMs), k-nearest neighbour (KNN), clustering, etc.) - **Deep learning** (e.g. convolutional neural networks (CNNs), Deep Belief Networks (DBNs)) - **Foundation models and Generative AI** (e.g. large language models, variational autoencoders, diffusion models, transformers). | [Add AI technique and algorithm (e.g. Deep learning, CNN).]  Click here to enter text. |
| 3.3 | **AI tool output** | Describe the output of the AI tool, such as low/high risk, yes/no decisions, percentage likelihood, or explainers like feature importance or contributing factors (e.g. the AI tool may provide a diagnostic classification or probability, recommend an action, trigger an alarm for an event, or initiate an action in a closed-loop system). | Click here to enter text. |
| 3.4 | **Stakeholder involvement** | Provide details of how different stakeholders have been engaged (or how you plan to engage) throughout the AI lifecycle, including their involvement in the project to date. | Click here to enter text. |
| 3.5 | **Intellectual property (IP)** | Provide details about the ownership of IP, either proposed or confirmed including any background IP.  Refer to [insert he healthcare organisation’s name]’s IP policy (if available).  (For more information on IP, see your jurisdictions IP office or equivalent  For example:  [European Union Intellectual Property Office](https://www.euipo.europa.eu/en)  [IP Australia](https://www.ipaustralia.gov.au/understanding-ip/who-owns-ip#:~:text=IP%20ownership%20basics,the%20creator%20or%20previous%20owner.)  [New Zealand Intellectual Property Office](https://www.iponz.govt.nz/)  [UK Intellectual Property Office](https://www.gov.uk/government/organisations/intellectual-property-office)  [United States Patent and Trademark Office](https://www.uspto.gov/patents/basics/patent-process-overview)) | Click here to enter text. |
| 3.6 | **Commercialisation arrangements** | Describe the commercialisation plans/agreements for the use of the AI tool/ algorithms developed at or with [insert healthcare organisation]. | Click here to enter text. |
| 3.7 | **Proposed research study design** | Describe the research study design to evaluate the AI tool (e.g. retrospective, prospective; single-site, multi-site design, RCT) and provide any supporting documentation. | Click here to enter text. |
| 3.8 | **Research ethics**  **documentation** | Has the project been reviewed by a Research ethics committee/board? | Yes  No  Working towards it  [If yes, provide approval letter, study protocol, participant information and consent form and any other relevant supporting information.]  [If no, state why not.]  [If working towards it, provide Project ID and any other supporting information.]  Click here to enter text. |
| Data pipeline (Max 250 words – per response) | | | |
| 3.9 | **Dataset preparation and target population** | Identify the input data (what are the sources of data to train/evaluate the AI tool), and how data was/will be acquired.  This could include:   - Sample size and how it was/will be determined. - Settings (e.g. inpatient, outpatient). - Patient demographics. - Timeframe. - Inclusion and exclusion (eligibility) criteria. - Missing populations. - Dataset harmonisation across different studies. - Difference between production and training data (i.e. If the target population differs from the population used during AI tool training, explain the differences)   Indicate any patient populations or clinical settings where the use of the AI tool would not be appropriate.  Also specify whether these processes were applied consistently across relevant demographic groups. | Click here to enter text. |
| 3.10 | **Dataset pre-processing and missing data** | Provide a high-level summary of the data cleaning and pre-processing steps applied before training and deploying the AI tool. Describe how missing data was or will be handled (e.g. complete-case analysis, single or multiple imputation). Summarise key pre-processing steps such as outlier management, normalisation, and de-identification. If the approach differs during implementation, please specify. List any general or specific steps undertaken for this AI tool. | Click here to enter text. |
| 3.11 | **Predicted target outcomes** | Define the primary and secondary outcomes that are predicted, including how and when they are assessed, such as likelihood of event x occurring (e.g. likelihood of sepsis in next 6 hours). | Click here to enter text. |
| 3.12 | **Gold standard definition of target outcomes** | Provide information on how the outcomes will be captured in practice (e.g. ICD-10 code, discrete documentation in EHR, etc.) and whether any data will be used as short-term proxy for true outcome of interest (e.g. the AI tool identifies sepsis cases using ICD-10 codes (A40-A41) recorded in the EHR at discharge.) | Click here to enter text. |
| Consumer/ user perspectives and involvement (Max 250 words – per response) | | | |
| 3.13 | **Patient/ consumer involvement** | Provide details of any patient and consumer involvement in the design, conduct, reporting, interpretation, or dissemination of the AI tool to date, including any existing or planned collaborations with patient groups, consumer advocacy organisations, or end-users. This may include feedback on tool development, testing and evaluation, as well as plans for ongoing or future engagement in these areas. | Click here to enter text. |
| 3.14 | **Patient/ consumer communication** | Describe how the potential use, risks and limitations of the AI tool are going to be communicated to patients/ health consumers. | Click here to enter text. |
| 3.15 | **Inclusive care** | Describe any steps taken to ensure the AI tool recognises and supports culturally and linguistically diverse populations, including any Indigenous or minority language groups relevant to your setting. Explain how cultural and linguistic inclusivity has been, or will be, built into the tool’s design and development. | Click here to enter text. |
| 3.16 | **Informed consent** | Does the AI tool require informed consent from patients? | Yes  No  [f yes, describe the consent process, including how patients are informed and how consent is recorded.]  If no, explain why informed consent is not required in this case.]  Click here to enter text. |
| 3.17 | **Health information** | Explain whether and how patients/cohorts have control over the use of their data by the AI tool. Describe the measures implemented to comply with your jurisdiction’s regulations. This includes consumers’ rights to access, correct, and control their personal data. | Click here to enter text. |
| 3.18 | **Feedback mechanisms** | Describe the feedback mechanisms, processes for redress and for reporting risks, errors or malfunctions after the AI tool has been implemented available to end-users, patients, health consumers, etc. | Click here to enter text. |
| 3.19 | **Access** | Explain whether the AI tool has been designed with accessibility considerations for relevant patient cohorts, including individuals with disability and varying levels of technological literacy. Describe how the AI tool is being developed to ensure equitable access for users of diverse abilities, languages, and technological proficiency, in compliance with local accessibility standards and inclusivity principles. | Click here to enter text. |

- 1. **VALIDATION AND SAFETY**

| AI tool Performance (Max 250 words – per response) | | | | |
| --- | --- | --- | --- | --- |
| 4.1 | **Performance** | Describe the performance of the AI tool (e.g. AUC, Confusion Matrix, Positive Predictive Value, etc.).  Identify the appropriate ‘gold standard’ benchmark (or current standard of care where no gold standard exists) against which the AI tool’s performance will be compared. | Click here to enter text. | |
| 4.2 | **Performance metrics rationale** | Provide a rationale for choosing specific performance metrics (e.g. discrimination vs. sensitivity and specificity, F1 score, etc.). | Click here to enter text. | |
| 4.3 | **Success metrics** | Describe the broad outcome goal (e.g. increasing referrals or decreasing specific adverse events). Include an evaluation of statistical risk of bias. For best practices, refer to: [PROBAST Best Practice Guide](https://www.probast.org/wp-content/uploads/2020/02/PROBAST_20190515.pdf). | Click here to enter text. | |
| 4.4 | **Validation methods** | Has/will appropriate statistical validation (internal and external) be conducted (e.g. has/will a three-phase validation process be conducted? Are the results available for public review for in silico validation, out-of-sample validation, and prospective observational validation?)  This could include accuracy, sensitivity, specificity, generalisability, reliability, precision, repeatability, robustness, and calibration curves. | Yes  No  Working towards it  [If yes, or working towards it, please provide summary information.]  [If no, state why not.]    Click here to enter text. | |
| 4.5 | **Ethical impact summary** | Summarise the anticipated ethical considerations relevant to this AI tool, including implications for equity, accountability, transparency, and unintended consequences. Reflect on who may benefit, who may be disadvantaged, and how these impacts have been addressed. | Click here to enter text. | |
| 4.6 | **Decision thresholds** | Describe decision threshold(s) and rationale for choice of threshold(s). What is the clinical accuracy needed for the AI tool to be utilised? | Click here to enter text. | |
| Clinical safety and risk (Max 250 words – per response) | | | | |
| 4.7 | **Quality and clinical governance** | Does/will the AI tool align with [insert jurisdiction/country] clinical governance Guidelines or equivalent? | Yes  No  Working towards it  [If yes, or working towards it, please provide further information.]  [If no, state why not.]    Click here to enter text. | |
| 4.8 | **NSQHS Standards** | Does the AI tool align with national safety health standards/ regulations, or equivalent?  If so, which standards does it comply with? If not, what steps are being taken to achieve compliance? | Yes  No  Not applicable  [If yes, provide further information.]  [If no, or not applicable, state why not.]    Click here to enter text. | |
| 4.9 | **Regulation & standards** | List the regulations and standards that apply to your AI tool and whether it is compliant.  Alignment to relevant standards could include ISO/IEC 23894:2023 Artificial intelligence — Guidance on risk management | Click here to enter text. | |
| 4.10 | **AI tool registration and certification** | Provide regulatory registration information. If the AI tool falls within specific regulation, please provide registration number or equivalent information. | Click here to enter text. | |
| 4.11 | **Further documentation** | Attach any other relevant clinical risk management documentation. Provide documentation names in space provided. | Click here to enter text. | |
| Technical security (Max 250 words – per response) | | | | |
| 4.12 | **Personally identifiable data** | Does or will the AI tool have access to/ use personally identifiable health data (e.g. patient data, staff data, financial data, etc.). | Yes  No  [If yes, list personally identifiable data.]  Click here to enter text. | |
| 4.13 | **Data privacy compliance and impact assessment** | Does the AI tool comply with [add healthcare organisation’s name]’s privacy guidelines, information security policies, etc.?  Provide evidence that you have undertaken a [Privacy Impact Assessment](https://www.oaic.gov.au/privacy/privacy-guidance-for-organisations-and-government-agencies/privacy-impact-assessments/guide-to-undertaking-privacy-impact-assessments#undertaking-a-pia) (if applicable) and confirm that the AI tool complies with privacy laws and your obligations under relevant legislation.  For example: [add relevant jurisdiction regulation/guidelines] | Yes  No  [If yes, please provide any relevant documentation.]  [If no, state why not.]  Click here to enter text. | |
| 4.14 | **Data storage** | Is this a cloud-based AI tool or based on premises?  Please also consider where the AI tool stores and processes data, including any third-party AI tools involved. | Click here to enter text. |  |
| 4.15 | **International data storage** | Does the AI tool process or store data in another country?  Is health information being accessed from another country?  (e.g. does the LLM store prompts and outputs for future AI development, etc.). | Yes  No  [If yes, name the country and set out how the arrangements are compliant with current legislation]    Click here to enter text. | |
| 4.16 | **Data control** | **Data security**  Describe how data will be secured against unauthorised access while ensuring suitable access for authorised users.  **Compliance with access control guidelines**  Describe how the AI tool aligns with relevant [insert healthcare organisation’s name]’s policies frameworks and guidelines..  **Data sharing**  Describe whether data will continue to be made available to the developer to re-train/ fine-tune the AI tool (e.g. does the LLM store prompts and outputs for future AI development). | Click here to enter text. | |
| 4.17 | **Technical & cyber security** | Does your AI tool follow [insert healthcare organisations name]’s cybersecurity policies framework and guidelines?  ? | Yes  No  Working towards it  Not applicable  [If yes, please provide any relevant documentation.]  [If no or not applicable, state why.]    Click here to enter text. | |
| 4.18 | **Penetration testing** | **Penetration test summary report**  Provide a summary of an external penetration test. The report should confirm that there are no vulnerabilities with a score of 7 or higher, based on the [Common Vulnerability Scoring System](https://www.first.org/cvss/). | Click here to enter text. | |
| 4.19 | **Source code security review** | Has the code had a security review (e.g. from a [Static Application Security Testing (SAST) Tool](https://www.nist.gov/itl/ssd/software-quality-group/source-code-security-analyzers))? | Yes  No  Working towards it  [If yes, or working towards it, please provide further information.]  [If no, state why not.]    Click here to enter text. | |
| 4.20 | **Multi-Factor Authentication** | Confirm whether all privileged accounts have appropriate Multi-Factor Authentication (MFA)? | Click here to enter text. | |

- 1. **IMPLEMENTATION AND INTEGRATION**

| Clinical workflow integration (Max 250 words – per response) | | | |
| --- | --- | --- | --- |
| 5.1 | **Service/ care pathway mapping** | Identify the elements of the health service/s that the AI tool will interact with and define the boundaries of the service/s?  Report any significant changes (or proposed changes) to the workflow or care pathway caused by the AI tool. List any potential flow on effects because of the AI tool (e.g. more referrals to other departments).  Describe who will use the tool. | Yes  No  Working towards it  [If yes, or working towards it, please provide relevant information.]  [If no, state why not.]    Click here to enter text. | |
| 5.2 | **Trial workflow changes** | Describe any significant changes to the clinical workflow or care pathway caused by the AI tool during training/ trial and if there were any unforeseen or unexpected outcomes. | Click here to enter text. | |
| 5.3 | **Continuity plan** | Describe the continuity plan to maintain critical operations in the event of system failures, data breaches, or other disruptions to ensure uninterrupted service delivery and patient safety, This should include both clinical and technical considerations. | Yes  No  Working towards it  [If yes, or working towards it, please provide further information.]  [If no, state why not.]    Click here to enter text. | |
| 5.4 | **Scoring timeframe and context** | How often does the AI tool evaluate patient data, and what workflow activities trigger its use? Consider the following aspects in your response:   - Timeliness & responsiveness: Are AI-generated insights available when needed? - Risk of delayed or outdated recommendations: How is the tool designed to minimise the risk of acting on outdated or inaccurate data? - Trigger-based vs. continuous evaluation: Does the AI tool operate continuously (e.g. real-time monitoring) or based on specific triggers (e.g. at triage, discharge, or after a test result)? | Click here to enter text. | |
| 5.5 | **Integration** | Describe how the AI tool will be integrated (or was in any trial setting), and any onsite or offsite requirements (e.g. specialised computer hardware, vendor-specific devices, cloud integration, fine tuning AI tool on local dataset, etc.) Have you confirmed that the integration of the AI tool is achievable with the relevant team (e.g. EHR team).  Describe the modality for integrating the AI tool into workflow (e.g. EHR, Patient Journey Board, etc.) and the type of function (e.g. dashboard, icon, pop ups, paging, etc.). Does the function state that it is AI generated? | Click here to enter text. | |
| 5.6 | **Load testing** | Confirm whether the AI tool has been load tested.  (i.e. The primary goal is to identify and address any bottlenecks, limitations, or failures that could impact user experience under real-world conditions once your model has been deployed). | Yes  No  [If yes, please provide summary information.]  [If no, state why not.]    Click here to enter text. | |
| Human-computer interaction (Max 250 words – per response) | | | |
| 5.7 | **Human-AI interaction** | Describe who will use the tool, how it will affect their workflow/ care provision and how workflow/ care provision will be modified. | Click here to enter text. | |
| 5.8 | **Liability** | Who/what is the final decision maker and who is liable for the final decision? | Click here to enter text. | |
| 5.9 | **User interface design** | Describe the method for how content, layout and format of the user interface was developed.  This includes the method for collecting the information needs of end users who will be interacting with the tool. | Click here to enter text. | |
| 5.10 | **User-facing explainability** | Describe how the AI tool communicates its outputs to the end user (e.g. clinician or patient). Does the interface include explanations, risk levels, or rationale for the recommendation?  Are users informed when they are interacting with an AI tool? | Click here to enter text. | |
| 5.11 | **User acceptance testing** | Did you undertake user acceptance testing to validate the usability of the AI tool? | Yes  No  Working towards it  [If yes, provide methodology and results. If working towards it, attach information that demonstrates that user acceptance testing is in place to validate usability.]  [If no, state why not.]    Click here to enter text. | |
| 5.12 | **Human-AI agreement** | Can the end-user control/ override AI outputs and recommendations and do they know it is an AI recommendation?  Describe any reports on user agreement with the AI tool, including instances or reasons for users deviating from the AI tool’s recommendations or changing their decisions based on the AI tool’s suggestions.  Additionally, describe how the AI tool’s outputs contribute, or are expected to contribute, to decision-making or other aspects of clinical practice or judgement. | Yes  No  [If no, please provide further details.]    Click here to enter text. | |
| 5.13 | **User training and communication** | **User knowledge and training**  Describe the level of knowledge required by users and the steps taken (or planned) to familiarise them with the AI tool, including any necessary training and education, including on the goal, approach, and potential limitations of the AI tool.  **Pre-deployment user training**  Detail any user training required before the AI tool is deployed, along with instructions on how users should handle input data.  **Communication to patients/health consumers**  Explain how the potential use, risks, and limitations of the AI tool will be communicated to patients or health consumers. | Click here to enter text. | |
| 5.14 | **Patient-facing documentation or demonstration** | Has documentation, educational material, or a demonstration of the AI tool been developed for patients or health consumers? | If yes, describe how this content was developed and how it will be shared (e.g. in clinics, via web portal, through clinicians).  If no, explain why and how patient understanding will be supported through other means. | |
| 5.15 | **Public transparency plan** | Describe whether and how information about the AI tool will be shared publicly. This may include details about:   - The tool’s intended use, performance, risks, validation results, and limitations - Transparency notices or risk summaries provided to patients or health consumers - Website content, public reporting, or listings in AI registries - Planned academic or policy publications - Any steps taken to build public trust through proactive disclosure | Click here to enter text.  If no public transparency measures are planned, explain why not and describe any alternative approaches to support external accountability or public awareness. | |
| 5.16 | **Risk management framework** | Describe how risks associated with the AI tool (e.g. patient safety, model performance, model drift) have been or will be identified, analysed, and minimised. Have any risks to patient safety (including indirect harm) been observed during model development or training? If so, how were they addressed?  Identify any significant errors or malfunctions related to the AI tool’s recommendations, supporting software/hardware, or user interactions during development/training. Provide details on:   - Rate of occurrence. - Apparent causes. - Correctability. - Potential impacts on patient care.   Describe how the AI tool aligns with [insert healthcare organisation’s name]’s risk management policies, frameworks and guidelines, including any risk assessment processes or mitigation strategies implemented to meet these requirements. | Click here to enter text. | |
| 5.17 | **Web content accessibility (if applicable)** | Is the AI tool [Web Content Accessibility Guidelines (WCAG) 2.1 compliant](https://www.w3.org/TR/WCAG21/)? | Yes  No  Working towards it  Not applicable  [If yes or working towards it, attach relevant information.]  [If no, state why not]  Click here to enter text. | |

- 1. **MONITORING AND EVALUATION**

| Monitoring and evaluation (Max 250 words – per response) | | | |
| --- | --- | --- | --- |
| 6.1 | **Monitoring and evaluation frequency** | Provide a timeline/ interval for regular re-validation and evaluation. Describe who is responsible for monitoring and evaluating the AI tool. | Click here to enter text. |
| 6.2 | **Equity analysis** | **Assessments for unequal performance**  Describe the methods or tests used or will be used to determine whether the AI tool performs differently across the different patient groups (e.g. did you test or plan to test whether the tool provides accurate, fair, and unbiased results for all groups).  **Number of participants**  For each group you analysed, provide the number of participants involved in the analysis. | Click here to enter text. |
| 6.3 | **Evaluation components** | **Impact of missing or messy data**  Describe the impact on key performance metrics when the AI tool encounters missing or messy data, data scarcity, etc.  **Impact of tool updates**  Outline the impact on key performance metrics before and after a tool update.  **Expected vs actual performance**  Explain any differences between the expected and actual performance of the AI tool.  **Methods for additional analyses**  Describe the methods used for additional analyses, such as subgroup analyses or adjusted analyses. | Click here to enter text. |
| 6.4 | **Safety monitoring and escalation triggers** | Describe the measures in place to monitor safety issues related to technical problems (e.g. distributional drift, reward hacking). After deployment, specify the governance roles required for risk management, periodic audits, maintenance, and supervision. Identify which teams, such as IT or healthcare administrators, are responsible for these roles and outline the requirements for providing continuous clinical and operational support.  In addition, identify any thresholds or events that would trigger a formal review, retraining, or withdrawal of the AI tool. Examples include unexpected safety signals, performance degradation, changes in input data patterns, external regulatory changes, or complaints from users or consumers.  Specify the responsible teams, escalation process, and what documentation or committee involvement would be required in each case. | Click here to enter text. |
| 6.5 | **Change management for AI model updates** | Describe how changes to the AI model will be tracked and approved.   - Include version control, audit trails, and any governance or committee approvals required for major changes. - Outline who is responsible for oversight (e.g. internal governance teams, vendors, or external collaborators). - • If different procedures apply to minor (e.g. bug fixes) vs major (e.g. retraining or architectural change) updates, explain how these are classified and managed. | Click here to enter text. |
| 6.6 | **AI tool removal plan** | Describe the plan for decommissioning the AI tool (e.g. failure, replacement, performance issues, vendor discontinuation, regulatory non-compliance, security risks, etc.). This should include a structured reporting framework to capture lessons learned, assess the impact decommissioning has on clinical workflows, and inform future AI governance decisions.  Describe how this process aligns with [insert healthcare organisation’s name]’s record management and archiving policies, frameworks or guidelines. | Click here to enter text. |
| 6.7 | **Alignment with Learning Health System** | Describe how the AI tool contributes to organisational learning and improvement over time.   - Will its implementation generate new insights, inform future care pathways, or enable iterative updates based on performance and user feedback? - • How will learnings from this tool be captured, shared, and used to inform broader system changes (e.g. policy, workflow, quality improvement)? | Click here to enter text. |

- 1. **FUNDING**

| Funding (Max 250 words – per response) | | | |
| --- | --- | --- | --- |
| 7.1 | **Pricing cost and structure** | Describe any upfront and ongoing costs of the AI tool to [insert healthcare organisation’s name] and details of the pricing structure (e.g. one-time purchase, subscription, etc.). | Click here to enter text. |
| 7.2 | **Implementation costs** | List the costs (proposed or actual) associated with the design, development and integration of the AI tool.  This could also include staff training and education, EHR mapping, informatics support, etc. | Click here to enter text. |
| 7.3 | **Technical support** | Provide details and associated costs and resources for any required technical support, including the duration (e.g. ongoing, one-time).  Provide any dependencies (e.g. EHR team needed for EHR integration). | Click here to enter text. |

- 1. **ADDITIONAL INFORMATION**

| Further information (Max 250 words - per response) | | |
| --- | --- | --- |
| 8.1 | **Provide additional information about the AI tool not covered above.** | Click here to enter text. |

- 1. **ENDORSEMENT**

| Endorsement by Head of Unit/ Department | | |
| --- | --- | --- |
| 9.1 | **I have read this form and support it.**  **I am aware of any financial and operational considerations.**  **I am aware of the potential risks associated with the AI tool.** | |
| Contact details | | |
| 9.2 | **Name** | Click here to enter text. |
| 9.3 | **Position** | Click here to enter text. |
| 9.4 | **Email** | Click here to enter text. |
| 9.5 | **Department** | Click here to enter text. |
| 9.6 | **Date** | Click here to enter text. |
| 9.7 | **Signature** | Click here to enter text. |

Appendix 4: Mapping ethics and governance principles – template

This template helps organisations identify where their existing principles are already operationalised, and which checklist questions correspond to each principle. Use this to customise the checklist for local use: retain, adapt, or remove items depending on what is already covered, while maintaining overall coverage of principles.

| **Existing policy/ Process addressing this?** | **Checklist domains** | **Checklist question/s** | **Ethics or governance principle** | **Action** |
| --- | --- | --- | --- | --- |
| Yes – Digital Health Policy | Explainability, Communication | Q3, Q5, Q21 | Transparency | Retain item; reinforce through communication plan |
| No | Bias & Equity | Q7, Q8, Q15 | Equity & Fairness | Keep in checklist; flag for ethics review |
| Partially – Ethics Committee processes | Consent & User Understanding | Q10, Q11 | Informed Consent | Cross-reference HREC; include in checklist |
| Yes – Clinical Governance Framework | Oversight & Risk | Q1, Q2, Q19 | Accountability | Reference existing process; modify wording if needed |
| No | Population Impact | Q6, Q8, Q14 | Cultural Safety | Add specific guidance for reviewers |
| Yes – IT Security Policy | Data Handling | Q12, Q13 | Data Privacy & Security | May defer to cybersecurity team; checklist optional |
| Yes – Clinical Governance Committee | Clinical Validation | Q4, Q9 | Clinical Safety & Effectiveness | Defer to existing processes; checklist for confirmation |

Appendix 5: Definition of AI ethics and governance principles

| **Principle** | **Description** |
| --- | --- |
| **Ethical principles** | |
| Accountability | “Those responsible for the different phases of the AI system lifecycle should be identifiable and accountable for the outcomes of the AI systems, and human oversight of AI systems should be enabled.” [1] |
| Autonomy & human-centred values | “Throughout their lifecycle, AI systems should respect human rights, diversity, and the autonomy of individuals.” [1] |
| Beneficence / Human, societal & environmental wellbeing | “Throughout their lifecycle, AI systems should benefit individuals, society and the environment.” [1] |
| Confidentiality | Refers to the duty for clinicians and data holders to keep patient health information private by preventing unauthorised access to this information. Sub-theme of privacy protection and security. [2] |
| Consent | “Informed consent involves the disclosure of relevant information, the individual being competent and fully comprehending this information, and the individual voluntarily accepting participation. The process of informed consent also involves clarifying concerns or misconceptions”. Includes consent to use data for AI model development, consent for data sharing, and consent for use of AI in patient care. [3] |
| Contestability | “When an AI system significantly impacts a person, community, group or environment, there should be a timely process to allow people to challenge the use or outcomes of the AI system.” [1] |
| Culturally appropriate | Does the AI include diverse cultural perspectives; is it acceptable to different cultural groups; are there equitable benefits? E.g. inclusion/respect for Aboriginal and Torres Strait Islander perspectives, protocols, and knowledge in the design, implementation, evaluation, and use of AI. [4] |
| Dignity | “Dignity is intertwined with human rights or otherwise means avoiding harm, forced acceptance, automated classification and unknown human–AI interaction. It is argued that AI should not diminish or destroy, but respect, preserve or even increase human dignity. Dignity is believed to be preserved if it is respected by AI developers in the first place and promoted through new legislation, through governance initiatives, or through government-issued technical and methodological guidelines”. [5] |
| Fairness & equity | “Throughout their lifecycle, AI systems should be inclusive and accessible and should not involve or result in unfair discrimination against individuals, communities or groups.” [1] |
| Non-maleficence | “The injunction to “Do No Harm,” that is, that every reasonable effort shall be made to avoid, prevent, and minimize harm or damage to any stakeholder.” [6] Harms may affect individuals, systems/organisations, infrastructure and social well-being. [4] |
| Privacy & security | “Throughout their lifecycle, AI systems should respect and uphold privacy rights and data protection and ensure the security of data” and systems. [1] |
| Reliability & safety | “Throughout their lifecycle, AI systems should reliably operate in accordance with their intended purpose.” [1] |
| Solidarity | “Solidarity is mostly referenced in relation to the implications of AI for the labour market. Sources call for a strong social safety net. They underline the need for redistributing the benefits of AI in order not to threaten social cohesion and respecting potentially vulnerable persons and groups. Lastly, there is a warning of data collection and practices focused on individuals that may undermine solidarity in favour of ‘radical individualism’” [94] |
| Sustainability | The AI system should be responsibly maintained and continue to produce benefit over time with minimal harm to the environment and health system. This involves consideration of the long-term social and environmental impacts of the AI system including energy/resource efficiency, intergenerational benefit, and ensuring organisations have the resources to sustain the system over time. [7] |
| Transparency & explainability | There should be transparency and responsible disclosure so people can understand when they are being significantly impacted by AI, and can find out when an AI system is engaging with them. Includes explainability, interpretability, and traceability/auditability. |
| Trust | “References to trust include calls for trustworthy AI research and technology, trustworthy AI developers and organizations, trustworthy ‘design principles’, or underline the importance of customers’ trust” [19]. |
| **Governance principles** | |
| Accuracy & model performance | “Accuracy describes evaluation based on how many right or wrong decisions a system makes. Example measurements are algorithmic accuracy, area under the curve (AUC) values, F1 scores, recall (sensitivity), precision, and specificity” [87] AI systems need to be evaluated and demonstrate performance as intended, according to appropriate metrics and standards that align with its context. |
| Appropriateness & relevance | AI should be the best solution to the identified problem, demonstrating fitness-for purpose, superiority to non-AI solutions, and usefulness. |
| Awareness, education, & training | System users should receive proper training and education to interact with the system as intended. |
| Data selection & management | Data needs to be selected, handled, and governed safely and responsibly. Appropriate practices and protocols should be established and enforced. |
| Financial considerations | Organisations developing and/or implementing AI systems may need to consider requirements for the system’s funding, cost-effectiveness, and commercialisation. |
| Interoperability | “Data interoperability refers to the ability to accurately interpret data that is exchanged between different systems or organizations. It involves ensuring that the data has clear and unambiguous meaning, is correctly mapped, and is formatted in the required form” [100]. |
| Ongoing monitoring & maintenance | AI systems should be monitored and maintained continuously across the life cycle. Includes risk management, appropriate reporting, system updates, and plans for decommissioning. |
| Organisational integration | “The organisational aspects of deploying the AI model and workflow.” [41] Includes leadership and responsibility structures, policy and strategy, and resources. |
| Regulatory compliance | AI model development and use should comply with legal, regulatory, contractual, or human rights laws and guidelines, e.g. privacy and confidentiality law, medical device regulations, clinical guidelines. |
| Stakeholder engagement | The active involvement of stakeholders in decision making processes, e.g. inclusion of multiple stakeholder perspectives in the design, implementation, or evaluation of AI solutions. |
| Technical integration | Integration of the AI tool into existing technical infrastructure (e.g. Electronic Health Records (EHR)). |
| Training & validation | AI models should be trained and validated on appropriate and representative data, following responsible processes and practices. |
| Usability & adoption | When integrating an AI solution, the AI and human-AI interface should be optimally designed to ensure the system is intuitive, accessible, learnable, efficient, and user-centric. Usability has direct impacts on user experience, user satisfaction, and uptake. |
| Workflow integration | Integration of the AI tool into existing clinical workflows with minimal disruption. May also include workflow redesign to align with new needs of the AI tool and its users. |

Appendix 6: AI use register template

| **Field** | **Description / Example** |
| --- | --- |
| Tool name | Name of the AI tool |
| Version | Software or model version number |
| Developer / vendor | Name of internal team or external vendor responsible |
| Submitting team / department | Name/ contact details of the unit and key contact proposing the tool |
| Primary use case | Clinical decision support, administrative automation, patient flow, etc. |
| Type of AI | Clinical, Administrative, Operational, Research / Experimental |
| Embedded or native | Whether the AI is embedded in an existing system or a standalone tool |
| Human oversight model | Human-in-the-loop / Human-on-the-loop / Autonomous |
| Patient impact level | Low / Moderate / High / NA |
| AI risk classification | Low / Medium / High (from checklist outcome) |
| Date submitted | Date the proposal was formally submitted |
| Review outcome | Approved / Approved with Conditions / Revisions Required / Not Approved |
| Conditions of approval (if any) | Any conditions imposed by the AI Governance Committee |
| Date of approval | Date the tool received formal approval |
| Monitoring plan required? | Yes / No |
| Monitoring start date | When post-implementation tracking begins |
| Last performance review | Date of last formal performance monitoring or audit |
| Next scheduled review | Date of next scheduled review or revalidation |
| Sunset / decommissioning plan | Yes / No + summary if applicable |
| Key ethical principles engaged | List principles most relevant to tool (e.g. fairness, transparency) |
| Link to supporting documents | Link to AI review checklist, validation reports, or other records |
| Status | Pending Review / In Use / Under Review / decommissioned / Rejected |

References

[1] Australian Government Department of Industry & Science and Resources. Australia’s AI Ethics Principles. (2022). <https://www.industry.gov.au/publications/australias-artificial-intelligence-ethics-framework/australias-ai-ethics-principles>.

[2] Solomonides, A. E. et al. Defining AMIA's artificial intelligence principles. *J Am Med Inform Assoc*. 29, 585-591 (2022). <https://dx.doi.org/10.1093/jamia/ocac006>

[3] Solanki, P., Grundy, J. & Hussain, W. Operationalising ethics in artificial intelligence for healthcare: A framework for AI developers. *AI and Ethics*. 3, 223-240 (2023). <https://doi.org/10.1007/s43681-022-00195-z>

[4] Siala, H. & Wang, Y. SHIFTing artificial intelligence to be responsible in healthcare: A systematic review. *Social Science & Medicine*. 296, 114782 (2022). <https://doi.org/10.1016/j.socscimed.2022.114782>

[5] World Health Organization. Ethics and governance of artificial intelligence for health: WHO guidance., (World Health Organization, Geneva, 2021). <https://www.who.int/publications/i/item/9789240029200>.

[6] Jobin, A., Ienca, M. & Vayena, E. The global landscape of AI ethics guidelines. *Nature Machine Intelligence*. 1, 389-399 (2019). <https://doi.org/10.1038/s42256-019-0088-2>

[7] Bertl, M., Ross, P. & Draheim, D. Systematic AI support for decision-making in the healthcare sector: Obstacles and success factors. *Health Policy and Technology*. 12, 100748 (2023). <https://doi.org/10.1016/j.hlpt.2023.100748>

[8] Belete, G. F., Voinov, A. & Laniak, G. F. An overview of the model integration process: From pre-integration assessment to testing. *Environmental Modelling & Software*. 87, 49-63 (2017). <https://doi.org/10.1016/j.envsoft.2016.10.013>

[9] Callahan, A. et al. Standing on FURM ground: A framework for evaluating Fair, Useful, and Reliable AI Models in healthcare systems. *NEJM Catal Innov Care Deliv*. 5 (2024). <https://doi.org/10.1056/CAT.24.0131>
